# Supplementary material
Source: MDPI journal article supplement (https://www.mdpi.com/2073-4395/13/6/1658)
Supplement: s1 [file s1]

Supplementary information

**Table S1.** ANOVA table showing means and significance for treatments from 2020 season.

| Genotype     | Nrate        | FCR   | Yield  | TW      | TGW  | HVK   | Screenings | GP           | SKHI | SY   | Semo<br>Only | L*   | a*   | b*   | MPT   | RBD  | WG   | GI   |
|--------------|--------------|-------|--------|---------|------|-------|------------|--------------|------|------|--------------|------|------|------|-------|------|------|------|
|              | (kg<br>N/ha) | (g/m) | (t/ha) | (Kg/hl) | (g)  | %     | %          | %<br>(11%mb) |      | %    | %            |      |      |      | (min) |      | %    |      |
| Jandaroi     | 0            | 0.0   | 2.3    | 78.6    | 41.8 | 99.7  | 3.4        | 13.9         | 88.4 | 73.6 | 52.0         | 80.9 | -2.7 | 28.7 | 3.5   | 46.1 | 32.2 | 93.1 |
| Jandaroi     | 0            | 0.5   | 1.9    | 78.6    | 39.9 | 99.9  | 3.5        | 13.9         | 88.3 | 73.7 | 51.9         | 81.0 | -2.7 | 28.5 | 3.1   | 46.2 | 31.3 | 89.8 |
| Jandaroi     | 0            | 2.0   | 1.9    | 78.1    | 37.6 | 99.9  | 3.9        | 14.1         | 85.8 | 74.2 | 52.3         | 80.6 | -2.6 | 28.5 | 3.2   | 48.9 | 32.6 | 81.7 |
| Jandaroi     | 50           | 0.0   | 2.6    | 78.8    | 38.0 | 100.0 | 2.7        | 14.3         | 88.5 | 74.0 | 52.0         | 80.7 | -2.6 | 28.6 | 3.3   | 52.4 | 33.0 | 92.5 |
| Jandaroi     | 50           | 0.5   | 2.2    | 78.0    | 39.8 | 99.7  | 5.1        | 14.0         | 87.1 | 73.7 | 52.0         | 80.8 | -2.6 | 28.5 | 3.3   | 49.7 | 31.3 | 87.7 |
| Jandaroi     | 50           | 2.0   | 1.7    | 77.3    | 37.0 | 99.6  | 6.0        | 14.4         | 86.4 | 73.8 | 52.0         | 80.7 | -2.6 | 28.5 | 3.2   | 47.2 | 32.1 | 86.4 |
| Jandaroi     | 100          | 0.0   | 2.4    | 78.7    | 39.9 | 99.9  | 2.5        | 14.5         | 88.8 | 73.9 | 51.8         | 80.9 | -2.7 | 28.4 | 3.6   | 45.1 | 32.8 | 94.1 |
| Jandaroi     | 100          | 0.5   | 1.8    | 77.5    | 38.2 | 100.0 | 5.9        | 14.7         | 86.8 | 73.7 | 51.7         | 80.7 | -2.5 | 28.2 | 3.3   | 48.9 | 32.9 | 85.4 |
| Jandaroi     | 100          | 2.0   | 1.8    | 77.1    | 37.6 | 99.9  | 6.2        | 14.6         | 87.8 | 73.9 | 51.8         | 80.6 | -2.5 | 28.1 | 3.3   | 51.4 | 33.4 | 84.8 |
| Jandaroi     | 150          | 0.0   | 2.3    | 78.8    | 40.4 | 99.8  | 2.8        | 14.8         | 87.6 | 74.2 | 51.8         | 80.8 | -2.6 | 28.2 | 3.3   | 46.9 | 34.5 | 92.8 |
| Jandaroi     | 150          | 0.5   | 1.8    | 77.6    | 36.4 | 99.9  | 5.4        | 14.6         | 86.2 | 73.6 | 51.6         | 80.6 | -2.5 | 28.1 | 3.4   | 48.7 | 34.2 | 84.9 |
| Jandaroi     | 150          | 2.0   | 1.8    | 77.6    | 41.3 | 99.9  | 4.2        | 14.7         | 88.4 | 73.8 | 51.5         | 80.8 | -2.4 | 27.9 | 3.2   | 48.2 | 33.9 | 83.1 |
| Jandaroi     | 200          | 0.0   | 2.5    | 78.6    | 38.9 | 99.9  | 3.1        | 14.9         | 88.3 | 74.0 | 51.6         | 80.5 | -2.6 | 28.6 | 3.5   | 47.1 | 34.4 | 91.8 |
| Jandaroi     | 200          | 0.5   | 1.9    | 77.7    | 37.2 | 99.8  | 5.1        | 15.2         | 85.8 | 74.2 | 51.8         | 80.5 | -2.4 | 28.1 | 3.1   | 45.5 | 34.6 | 85.1 |
| Jandaroi     | 200          | 2.0   | 1.8    | 77.6    | 38.9 | 99.8  | 4.6        | 14.8         | 84.7 | 74.0 | 51.9         | 80.7 | -2.5 | 28.1 | 3.2   | 54.3 | 34.6 | 79.6 |
| DBA Lillaroi | 0            | 0.0   | 2.2    | 79.6    | 46.6 | 99.7  | 3.1        | 13.8         | 87.0 | 75.3 | 54.1         | 80.7 | -3.3 | 31.4 | 2.8   | 53.3 | 34.1 | 71.3 |

|              |     |     |       |        |       |       |       |       |      |       |       |       |      |       |       |       |       |       |
|--------------|-----|-----|-------|--------|-------|-------|-------|-------|------|-------|-------|-------|------|-------|-------|-------|-------|-------|
| DBA Lillaroï | 0   | 0.5 | 2.0   | 79.2   | 45.6  | 99.8  | 3.7   | 13.8  | 87.0 | 75.6  | 54.5  | 80.6  | -3.1 | 30.9  | 2.8   | 51.1  | 35.0  | 56.9  |
| DBA Lillaroï | 0   | 2.0 | 1.7   | 79.4   | 45.4  | 99.6  | 3.8   | 13.6  | 86.2 | 75.6  | 54.2  | 80.5  | -3.1 | 31.0  | 2.8   | 60.1  | 35.0  | 52.4  |
| DBA Lillaroï | 50  | 0.0 | 2.3   | 79.0   | 44.3  | 100.0 | 3.0   | 13.8  | 87.8 | 74.9  | 53.9  | 80.7  | -3.2 | 31.5  | 3.0   | 52.2  | 33.8  | 67.8  |
| DBA Lillaroï | 50  | 0.5 | 1.9   | 78.9   | 44.9  | 99.5  | 4.3   | 13.9  | 86.4 | 75.1  | 54.0  | 80.7  | -3.1 | 31.0  | 2.6   | 59.8  | 35.3  | 55.0  |
| DBA Lillaroï | 50  | 2.0 | 1.9   | 79.5   | 44.6  | 99.8  | 3.8   | 13.7  | 85.0 | 75.9  | 54.5  | 80.3  | -3.0 | 30.9  | 2.8   | 56.1  | 34.7  | 57.7  |
| DBA Lillaroï | 100 | 0.0 | 2.3   | 78.8   | 42.7  | 99.6  | 3.2   | 14.4  | 85.3 | 75.3  | 54.0  | 80.2  | -3.0 | 31.3  | 2.7   | 45.8  | 36.1  | 67.5  |
| DBA Lillaroï | 100 | 0.5 | 2.1   | 79.3   | 44.5  | 99.8  | 3.1   | 14.1  | 85.2 | 75.2  | 53.9  | 80.5  | -3.1 | 31.1  | 2.7   | 58.6  | 35.9  | 61.3  |
| DBA Lillaroï | 100 | 2.0 | 1.8   | 79.3   | 44.4  | 99.3  | 3.3   | 14.3  | 87.9 | 75.8  | 54.2  | 80.3  | -2.9 | 30.8  | 2.7   | 55.4  | 36.3  | 53.4  |
| DBA Lillaroï | 150 | 0.0 | 2.4   | 79.6   | 47.7  | 100.0 | 3.1   | 14.6  | 85.7 | 75.3  | 54.1  | 80.3  | -3.1 | 30.9  | 2.8   | 48.2  | 36.6  | 67.9  |
| DBA Lillaroï | 150 | 0.5 | 2.0   | 78.7   | 45.4  | 99.9  | 3.7   | 14.4  | 87.1 | 75.3  | 53.6  | 80.3  | -2.9 | 30.7  | 2.9   | 52.2  | 36.4  | 58.9  |
| DBA Lillaroï | 150 | 2.0 | 1.5   | 78.6   | 44.7  | 99.5  | 3.6   | 14.3  | 86.7 | 75.5  | 54.1  | 80.5  | -3.0 | 30.9  | 2.6   | 56.7  | 36.7  | 56.3  |
| DBA Lillaroï | 200 | 0.0 | 2.2   | 78.5   | 42.8  | 99.9  | 3.4   | 15.0  | 84.5 | 75.0  | 53.6  | 80.3  | -3.0 | 31.2  | 2.7   | 53.7  | 38.1  | 64.2  |
| DBA Lillaroï | 200 | 0.5 | 1.8   | 78.4   | 42.5  | 99.7  | 4.2   | 14.8  | 85.4 | 75.1  | 53.8  | 80.2  | -2.9 | 30.5  | 2.6   | 59.4  | 37.8  | 53.4  |
| DBA Lillaroï | 200 | 2.0 | 1.8   | 79.2   | 44.1  | 99.9  | 3.3   | 14.4  | 85.5 | 75.7  | 53.9  | 80.4  | -2.9 | 30.4  | 2.6   | 63.9  | 38.4  | 49.3  |
| LSD          |     |     | 0.08  | 0.52   | 2.27  | 0.05  | 0.98  | 0.31  | 0.82 | 0.33  | 0.35  | 0.26  |      | 0.73  | 0.12  | 4.10  | 1.03  | 3.88  |
| Genotype     |     |     | ns    | <0.05  | <.001 | <.05  | <.05  | <.001 | <.05 | <.001 | <.001 | <.001 |      | <.001 | <.001 | <.001 | <.001 | <.001 |
| Nrate        |     |     | ns    | ns     | <.05  | ns    | ns    | <.001 | ns   | ns    | <.05  | <.05  |      | <.05  | ns    | ns    | <.001 | ns    |
| FCR          |     |     | <.001 | <.0010 | ns    | ns    | <.001 | ns    | ns   | <.05  | ns    | ns    |      | <.05  | <.05  | <.05  | ns    | <.05  |
| interactions |     |     | ns    | VxFCR  | ns    | ns    | VxFCR | ns    | ns   | ns    | ns    | ns    |      | ns    | ns    | ns    | ns    | ns    |

ns=not significant,  
P<0.05

**Table S2.** ANOVA table showing means and significance for treatments from 2021 season.

| Genotype     | Nrate        | FCR   | Yield  | TW      | TGW  | HVK | FN    | SCR | GP               | SKHI | SY   | Semo Only | L*   | a*   | b*   | MPT   | RBD | WG   | GI |
|--------------|--------------|-------|--------|---------|------|-----|-------|-----|------------------|------|------|-----------|------|------|------|-------|-----|------|----|
|              | (Kg<br>N/ha) | (g/m) | (t/ha) | (Kg/hl) | (g)  | %   | (sec) | %   | %<br>(11%mb<br>) |      | %    | %         |      |      |      | (min) |     | %    |    |
| Jandaroi     | 0            | 0     | 4.2    | 79.2    | 45.9 | 81  | 269   | 0.8 | 10.4             | 91.5 | 70.6 | 60.3      | 81.4 | -3.0 | 26.7 | 4.2   | 24  | 22.2 | 98 |
| Jandaroi     | 0            | 0.75  | 4.2    | 78.9    | 45.4 | 76  | 275   | 1.0 | 10.5             | 92.2 | 70.9 | 60.5      | 81.5 | -3.1 | 26.8 | 4.7   | 31  | 21.3 | 98 |
| Jandaroi     | 0            | 1.5   | 3.7    | 78.9    | 45.7 | 81  | 290   | 1.0 | 10.4             | 91.5 | 70.7 | 60.2      | 81.4 | -3.1 | 27.0 | 4.1   | 26  | 21.7 | 97 |
| Jandaroi     | 20           | 0     | 4.9    | 79.0    | 45.1 | 84  | 274   | 0.8 | 10.4             | 95.2 | 70.9 | 61.0      | 81.0 | -3.0 | 27.3 | 4.4   | 22  | 22.2 | 98 |
| Jandaroi     | 20           | 0.75  | 4.8    | 78.9    | 44.6 | 81  | 264   | 0.9 | 10.9             | 94.9 | 70.8 | 60.7      | 81.0 | -3.0 | 27.1 | 4.2   | 26  | 22.6 | 97 |
| Jandaroi     | 20           | 1.5   | 4.3    | 78.9    | 44.2 | 84  | 268   | 1.0 | 10.5             | 94.5 | 70.7 | 60.6      | 81.4 | -3.1 | 27.4 | 4.4   | 28  | 22.2 | 97 |
| Jandaroi     | 40           | 0     | 4.8    | 78.8    | 44.7 | 88  | 277   | 1.1 | 11.0             | 97.8 | 71.0 | 61.2      | 81.0 | -3.1 | 27.6 | 4.2   | 30  | 24.5 | 95 |
| Jandaroi     | 40           | 0.75  | 4.9    | 79.1    | 45.0 | 89  | 279   | 0.9 | 11.0             | 95.9 | 70.9 | 60.9      | 81.2 | -3.1 | 27.3 | 4.4   | 27  | 22.7 | 95 |
| Jandaroi     | 40           | 1.5   | 4.7    | 79.0    | 44.5 | 89  | 253   | 0.9 | 11.3             | 98.8 | 71.4 | 61.5      | 80.9 | -3.0 | 27.3 | 4.3   | 33  | 23.6 | 95 |
| Jandaroi     | 80           | 0     | 5.3    | 78.7    | 44.7 | 95  | 249   | 0.8 | 11.6             | 95.9 | 71.0 | 61.3      | 80.6 | -2.8 | 27.3 | 4.1   | 33  | 25.0 | 96 |
| Jandaroi     | 80           | 0.75  | 4.9    | 78.9    | 44.4 | 94  | 258   | 1.0 | 11.9             | 99.8 | 71.0 | 61.1      | 80.8 | -3.0 | 27.7 | 4.0   | 34  | 25.0 | 97 |
| Jandaroi     | 80           | 1.5   | 4.9    | 78.6    | 43.7 | 92  | 245   | 1.0 | 11.7             | 98.2 | 71.1 | 61.0      | 80.8 | -2.9 | 27.1 | 3.8   | 41  | 25.3 | 95 |
| Jandaroi     | 160          | 0     | 5.5    | 78.4    | 45.1 | 98  | 215   | 0.7 | 13.0             | 93.6 | 70.8 | 60.4      | 80.5 | -2.8 | 27.3 | 3.5   | 47  | 28.7 | 94 |
| Jandaroi     | 160          | 0.75  | 5.4    | 78.2    | 44.6 | 97  | 203   | 0.9 | 12.8             | 97.9 | 71.0 | 60.7      | 80.5 | -2.8 | 27.2 | 3.8   | 40  | 27.8 | 96 |
| Jandaroi     | 160          | 1.5   | 5.2    | 78.0    | 44.1 | 98  | 213   | 0.9 | 12.8             | 96.3 | 71.1 | 60.8      | 80.4 | -2.8 | 27.4 | 3.4   | 52  | 27.7 | 96 |
| DBA Lillaroi | 0            | 0     | 4.2    | 78.7    | 48.5 | 63  | 277   | 0.9 | 10.5             | 91.7 | 72.2 | 60.3      | 81.6 | -3.7 | 29.8 | 3.8   | 29  | 21.1 | 92 |
| DBA Lillaroi | 0            | 0.75  | 4.1    | 78.3    | 48.0 | 54  | 276   | 1.0 | 9.8              | 79.6 | 71.9 | 59.1      | 82.1 | -3.7 | 29.1 | 4.2   | 27  | 20.4 | 96 |
| DBA Lillaroi | 0            | 1.5   | 4.0    | 78.4    | 47.9 | 63  | 264   | 1.2 | 9.9              | 86.3 | 72.1 | 60.3      | 81.6 | -3.6 | 29.6 | 4.3   | 26  | 21.5 | 89 |
| DBA Lillaroi | 20           | 0     | 5.0    | 78.8    | 48.5 | 74  | 247   | 0.9 | 10.7             | 90.1 | 72.1 | 61.5      | 81.0 | -3.7 | 30.4 | 3.7   | 36  | 22.8 | 91 |
| DBA Lillaroi | 20           | 0.75  | 4.6    | 78.4    | 46.6 | 65  | 265   | 1.1 | 10.1             | 88.2 | 72.1 | 60.3      | 81.6 | -3.7 | 29.8 | 4.2   | 28  | 20.8 | 94 |
| DBA Lillaroi | 20           | 1.5   | 4.8    | 78.7    | 47.5 | 64  | 276   | 0.9 | 10.3             | 87.0 | 72.2 | 60.5      | 81.3 | -3.6 | 29.7 | 4.1   | 32  | 22.0 | 87 |
| DBA Lillaroi | 40           | 0     | 4.5    | 78.9    | 48.0 | 74  | 254   | 1.1 | 10.5             | 90.9 | 72.3 | 61.2      | 81.2 | -3.7 | 30.5 | 3.6   | 30  | 22.8 | 88 |
| DBA Lillaroi | 40           | 0.75  | 5.1    | 79.1    | 49.0 | 82  | 260   | 1.0 | 10.6             | 92.1 | 72.7 | 62.2      | 80.6 | -3.5 | 30.5 | 3.7   | 39  | 24.7 | 82 |
| DBA Lillaroi | 40           | 1.5   | 4.7    | 78.7    | 47.0 | 75  | 240   | 1.0 | 10.6             | 92.8 | 72.8 | 61.5      | 81.0 | -3.5 | 30.2 | 3.6   | 38  | 22.9 | 89 |
| DBA Lillaroi | 80           | 0     | 5.4    | 78.8    | 48.3 | 86  | 241   | 0.9 | 11.3             | 92.8 | 72.5 | 62.4      | 80.5 | -3.5 | 30.8 | 3.4   | 41  | 24.9 | 82 |
| DBA Lillaroi | 80           | 0.75  | 5.3    | 78.8    | 48.1 | 84  | 238   | 0.9 | 11.4             | 93.5 | 72.4 | 62.2      | 80.6 | -3.5 | 30.7 | 3.5   | 49  | 25.4 | 83 |
| DBA Lillaroi | 80           | 1.5   | 4.7    | 78.5    | 47.5 | 83  | 237   | 1.1 | 11.4             | 93.7 | 72.8 | 62.4      | 80.5 | -3.5 | 30.7 | 3.6   | 46  | 25.2 | 83 |

|              |     |      |       |         |       |       |       |      |       |       |       |       |         |       |         |       |       |       |         |
|--------------|-----|------|-------|---------|-------|-------|-------|------|-------|-------|-------|-------|---------|-------|---------|-------|-------|-------|---------|
| DBA Lillaroï | 160 | 0    | 5.6   | 78.3    | 48.2  | 95    | 185   | 1.0  | 12.5  | 95.6  | 72.3  | 62.3  | 80.3    | -3.5  | 31.0    | 3.1   | 55    | 29.2  | 79      |
| DBA Lillaroï | 160 | 0.75 | 5.7   | 78.5    | 48.7  | 95    | 211   | 0.8  | 12.3  | 92.6  | 72.7  | 62.9  | 80.1    | -3.4  | 30.6    | 3.0   | 55    | 29.4  | 71      |
| DBA Lillaroï | 160 | 1.5  | 5.1   | 78.4    | 48.3  | 94    | 206   | 1.2  | 12.6  | 95.8  | 72.5  | 62.5  | 80.1    | -3.3  | 30.8    | 3.2   | 48    | 29.1  | 77      |
| LSD          |     |      | 0.35  | 0.29    | 1.43  | 5.96  | 16.36 | 0.07 | 0.42  | 2.95  | 0.34  | 0.52  | 0.22    | 0.10  | 0.36    | 0.35  | 6.57  | 0.80  | 3.42    |
| Genotype     |     |      | ns    | <0.05   | <.001 | <.001 | <.001 | 0.02 | <.001 | <.001 | <.001 | <.001 | ns      | <.001 | <.001   | <.001 | <.001 | ns    | <.001   |
| Nrate        |     |      | <.001 | <.001   | <0.05 | <.001 | <.001 | ns   | <.001 | <.001 | <.001 | <.001 | <.001   | <.001 | <.001   | <.001 | <.001 | <.001 | <.001   |
| FCR          |     |      | <.001 | ns      | <0.05 | ns    | ns    | ns   | ns    | ns    | ns    | ns    | ns      | ns    | ns      | ns    | ns    | ns    | ns      |
| Interactions |     |      | ns    | VxNrate | ns    | ns    | ns    | ns   | ns    | ns    | ns    | VxN   | VxNrate | ns    | VxNrate | ns    | ns    | ns    | VxNrate |

**Table S3.** Means and LSD for % Fusarium infection for both varieties at different disease application rates - Tamworth 2021.

| Variety      | FCR Inoculation (g/m) |         |         |
|--------------|-----------------------|---------|---------|
|              | 0                     | 0.75    | 1.5     |
| Jandaroi     | 1.60aA                | 45.60aB | 69.40aC |
| DBA Lillaroi | 1.40aA                | 49.40bB | 69.60aC |
| LSD          | 3.03                  |         |         |

Values with the same lowercase letter in the same column are not significantly different and values with the same upper case letter in the same row are not significantly different,  $p < 0.05$ .

**Table S4.** Means and LSD for % Fusarium infection for both varieties at different disease and nitrogen application rates - Tamworth 2020.

| Variety      | FCR<br>(g/m) | Nrate (kg/ha) |         |         |         |        |
|--------------|--------------|---------------|---------|---------|---------|--------|
|              |              | 0             | 50      | 100     | 150     | 200    |
| Jandaroi     | 0            | 2.0aA         | 6.0aA   | 7.0aA   | 6.0aA   | 6.0aA  |
|              | 0.5          | 30.0bA        | 32.0bA  | 46.0bB  | 45.0bB  | 54.0bC |
|              | 2.0          | 72.0cA        | 72.0cA  | 76.0cAB | 80.0cAB | 83.0cB |
| DBA Lillaroi | 0            | 5.0aA         | 6.3aA   | 4.0aA   | 7.3aA   | 4.0aA  |
|              | 0.5          | 38.0bA        | 42.0dA  | 47.0bAB | 53.0bBC | 58.0bC |
|              | 2.0          | 75.0cA        | 77.0cAB | 85.0cBC | 86.0cBC | 89.0cC |
| LSD          |              | 9.08          |         |         |         |        |

Values with the same lowercase letter in the same column are not significantly different and values with the same upper case letter in the same row are not significantly different,  $p < 0.05$ .

**Table S5.** Mean SE-HLPC data for two durum wheat varieties at 4N rates and 2 FCR inoculations in mature grain from 2021 season.

| Genotype     | N rate<br>(kg<br>N/ha) | FCR<br>(g/m) | P/M   | Gli/Glu | UPP%  | %SolA | %SolB       | %SolC | %InsolA | %InsolB | %InsolC | Total<br>Area |
|--------------|------------------------|--------------|-------|---------|-------|-------|-------------|-------|---------|---------|---------|---------------|
| Jandaroi     | 0                      | 0            | 1.01  | 0.74a   | 28.47 | 35.79 | 34.46a      | 12.62 | 14.19e  | 2.21    | 0.72    | 43752809      |
| Jandaroi     | 0                      | 1.5          | 1.02  | 0.73a   | 25.36 | 37.71 | 34.82ab     | 11.88 | 12.77de | 2.13    | 0.70    | 43620193      |
| Jandaroi     | 40                     | 0            | 0.95  | 0.78abc | 25.47 | 36.16 | 35.23abcd   | 13.33 | 12.34cd | 2.17    | 0.76    | 44883926      |
| Jandaroi     | 40                     | 1.5          | 0.97  | 0.76ab  | 27.62 | 35.58 | 34.95abc    | 12.93 | 13.54de | 2.23    | 0.76    | 44816265      |
| Jandaroi     | 80                     | 0            | 0.96  | 0.78abc | 26.17 | 36.12 | 35.71abcdef | 12.64 | 12.71de | 2.13    | 0.69    | 46813416      |
| Jandaroi     | 80                     | 1.5          | 0.91  | 0.82bc  | 26.25 | 34.92 | 36.28cdefg  | 13.71 | 12.32cd | 2.10    | 0.67    | 47870491      |
| Jandaroi     | 160                    | 0            | 0.98  | 0.78abc | 28.04 | 35.52 | 36.11bcdefg | 11.51 | 13.85de | 2.32    | 0.69    | 54017130      |
| Jandaroi     | 160                    | 1.5          | 0.90  | 0.83bc  | 27.49 | 34.24 | 36.64efgh   | 13.11 | 13.04de | 2.25    | 0.71    | 52463957      |
| DBA Lillaroï | 0                      | 0            | 0.94  | 0.78abc | 19.40 | 39.05 | 36.11bcdefg | 13.01 | 9.37ab  | 1.80    | 0.66    | 43496710      |
| DBA Lillaroï | 0                      | 1.5          | 0.90  | 0.79abc | 21.22 | 37.14 | 35.03abcd   | 15.36 | 9.93ab  | 1.84    | 0.71    | 41210808      |
| DBA Lillaroï | 40                     | 0            | 0.96  | 0.76ab  | 19.34 | 39.42 | 35.48abcde  | 13.37 | 9.45ab  | 1.69    | 0.59    | 42665147      |
| DBA Lillaroï | 40                     | 1.5          | 0.92  | 0.80abc | 19.13 | 38.69 | 36.34defgh  | 13.45 | 9.12ab  | 1.76    | 0.64    | 43772307      |
| DBA Lillaroï | 80                     | 0            | 0.86  | 0.84c   | 19.43 | 37.18 | 37.01fgh    | 14.59 | 8.89a   | 1.72    | 0.61    | 46187819      |
| DBA Lillaroï | 80                     | 1.5          | 0.92  | 0.81bc  | 18.85 | 38.94 | 37.39gh     | 12.57 | 9.01a   | 1.55    | 0.54    | 46761999      |
| DBA Lillaroï | 160                    | 0            | 0.94  | 0.82bc  | 22.29 | 37.71 | 37.69h      | 11.07 | 10.79bc | 2.09    | 0.64    | 52503063      |
| DBA Lillaroï | 160                    | 1.5          | 0.90  | 0.84c   | 21.40 | 37.01 | 37.70h      | 12.65 | 10.12ab | 1.91    | 0.62    | 51863401      |
| Fpr          |                        | LSD          | 0.113 | 0.0711  | 3.37  | 2.996 | 1.379       | 2.942 | 1.761   | 0.238   | 0.046   |               |
|              |                        | Genotype     | <0.05 | <0.05   | <.001 | <.001 | <.001       | ns    | <.001   | <.001   | <.001   |               |
|              |                        | Nrate        | ns    | <0.05   | ns    | ns    | <.001       | ns    | <0.05   | <0.05   | ns      |               |
|              |                        | FCR          | ns    | ns      | ns    | ns    | ns          | ns    | ns      | ns      | ns      |               |
|              |                        | Interactions | ns    | ns      | ns    | ns    | ns          | ns    | ns      | ns      | ns      |               |

Numbers with alike lower case letters in the same column are not significantly different,  $p < 0.05$ . Fpr=probability for significance and level for each factor.

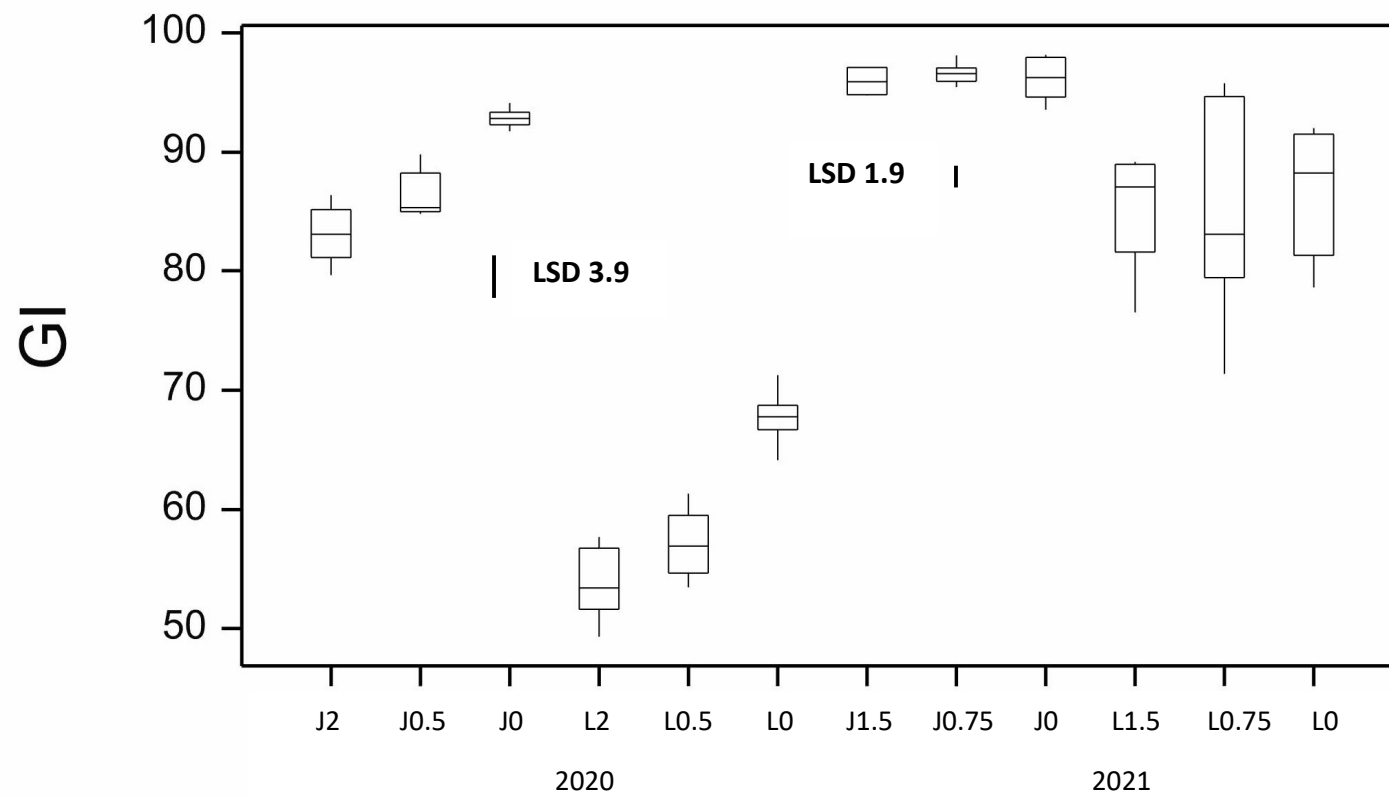

**Figure S1.** Boxplot showing gluten index (GI) for both varieties at different FCR inoculation rates (g/m) for 2020 and 2021 seasons. LSD statistic shown for each year
